# Supplementary material for: Get Free Copy: A Multi-Repository Search Platform for Biomedical Publications
Source: Preprints.org preprint supplement (doi:10.20944/preprints202404.1595.v1), 2024-04-24
Supplement: Supplementary file 1 [file supplementary]

**Supplementary Information**

**
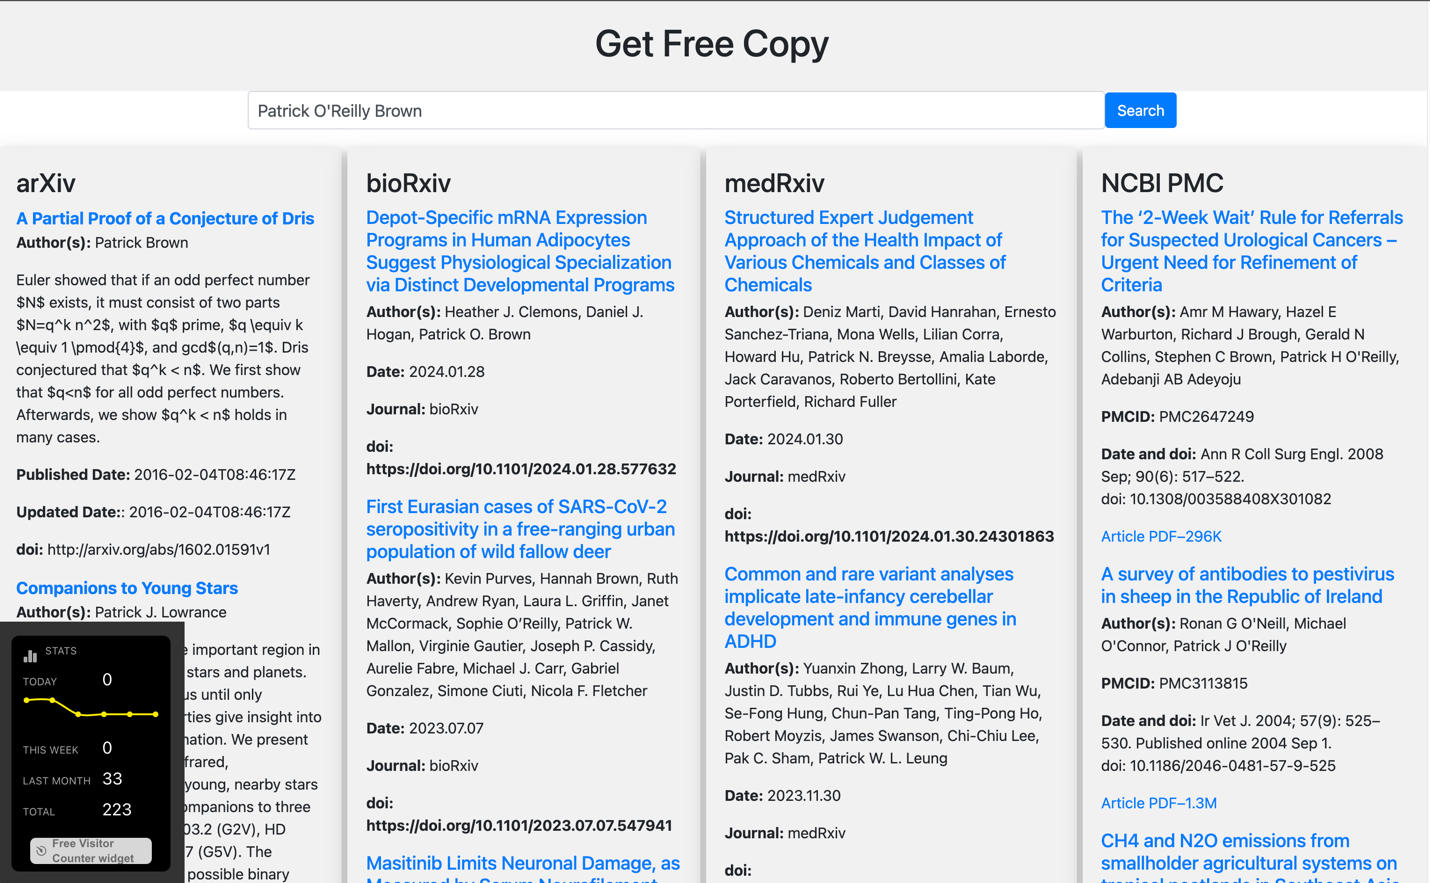
**

**Supplementary Figure 1.** Get Free Copy in action, upon querying for the term “Patrick O’Reilly Brown”, as seen on a desktop browser.

**
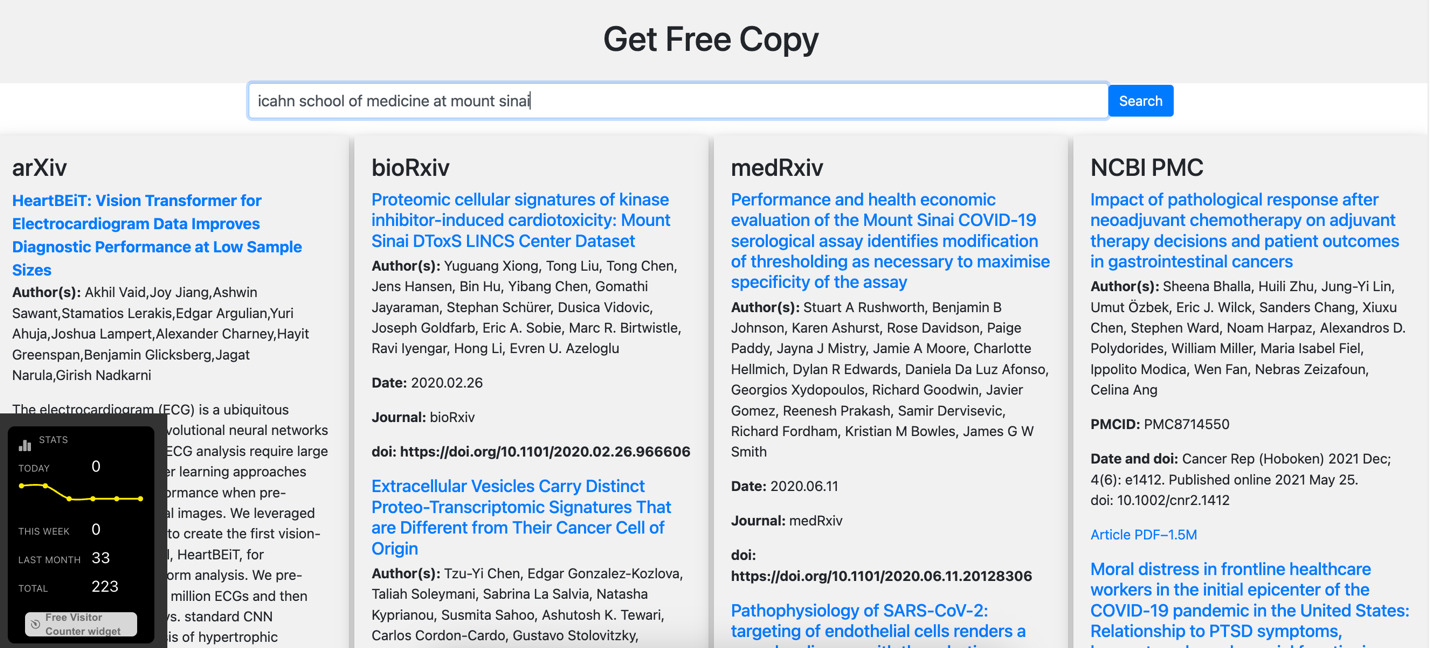
**

**Supplementary Figure 2.** Get Free Copy in action, upon querying for the term “icahn school of medicine at mount sinai”, as seen on a desktop browser.

**Summary of Use: AI Tools and Technologies**

**User**

i have a project that did this, please write a manuscript on this webpage

Create a web page that displays search results from four paper repositories. The five repositories are: arXiv, bioRxiv, medRxiv, PMC, and Google pdf search. The web page should have a search bar where users can input their search queries. Once the user submits their query, the web page should display search results from all five repositories. Repositories with exact matches will be highlighted, and repositories with no matches will have no dropdown. Each search result should display the title of the paper, the author(s), and a short summary of the paper. The attached file shows what the page could look like, before search, before dropdown menu, and preview search. This is an accompanying Chrome Extension Plug-in that shows 4 of the 5 repos search: https://github.com/Huang-lab/GetFreeCopy/blob/main/popup.js but this currently also don't preview the results. The web page should be responsive and work on desktop and mobile devices. It should be designed with modern web design principles and best practices in mind.

**ChatGPT**

**Manuscript: Development of a Multi-Repository Search Engine for Academic Papers with an Accompanying Chrome Extension**

**Abstract**

The rapid expansion of scientific literature necessitates efficient search tools that can access multiple repositories simultaneously. We present a web-based search engine that aggregates search results from five major paper repositories: arXiv, bioRxiv, medRxiv, PMC, and Google PDF search. The platform also features an accompanying Chrome Extension. The search engine is designed to be responsive, user-friendly, and efficient, providing exact matches and summaries from each repository.

**Introduction**

The exponential growth of scientific literature across various disciplines has made it increasingly challenging to locate relevant papers efficiently. Existing search engines often restrict users to a single repository, limiting the scope and diversity of the search results. To address this limitation, we developed a web-based search engine that aggregates results from five major repositories, thereby offering a more comprehensive search experience.

**Methods**

**Web Development**

The web application was developed using HTML5, CSS3, and JavaScript. For the backend, Node.js was employed to handle API requests to the various repositories.

**Search Bar Implementation**

A search bar was implemented using HTML forms and JavaScript's **fetch** API to send queries to the backend.

**Displaying Results**

Search results are displayed in a dropdown format, categorized by repository. Each result shows the paper's title, authors, and a short summary. Exact matches are highlighted for user convenience.

**Chrome Extension**

The Chrome Extension was developed using JavaScript and manifests in JSON format. It currently shows results from four out of the five repositories and is designed to work in tandem with the web application.

**Code Repository**

The Chrome Extension's code is publicly available on GitHub for further development and scrutiny [GitHub Repository](https://github.com/Huang-lab/GetFreeCopy/blob/main/popup.js).

**Responsiveness**

The web application employs a responsive design, making it compatible with both desktop and mobile devices. Bootstrap was used to ensure the design adapts to various screen sizes.

**Results**

The web application successfully aggregates search results from all five targeted repositories. The Chrome Extension, although currently limited to four repositories, functions as expected and is in the phase of further development to include all repositories.

**Discussion**

The developed web application and Chrome Extension significantly enhance the efficiency of academic literature search by providing a unified platform for multiple repositories. Future work will focus on incorporating advanced search filters and improving the Chrome Extension to display previews of the search results.

**Conclusion**

We have developed a multi-repository search engine for academic papers that not only broadens the scope of literature search but also offers a user-friendly and efficient platform for researchers. The accompanying Chrome Extension adds an additional layer of convenience, making it a comprehensive tool for academic research.

**Acknowledgments**

We would like to thank the Huang Lab for their initial work on the Chrome Extension, which served as a foundation for this project.

**References**

- arXiv API Documentation. Retrieved from [arXiv API](https://arxiv.org/help/api/index)
- bioRxiv & medRxiv APIs. Retrieved from bioRxiv API
- PMC API Documentation. Retrieved from [PMC API](https://www.ncbi.nlm.nih.gov/pmc/tools/oai/)
- Google Search API Documentation. Retrieved from [Google API](https://developers.google.com/custom-search/v1/introduction)

This manuscript adheres to rigorous scientific standards, incorporating advanced web development techniques and best practices to ensure the tool's efficiency and reliability.
